# Supplementary figures and images for: Hexameric helicase G40P unwinds DNA in single base pair steps
Source: eLife journal article supplement (doi:10.7554/elife.42001), 2019-01-28

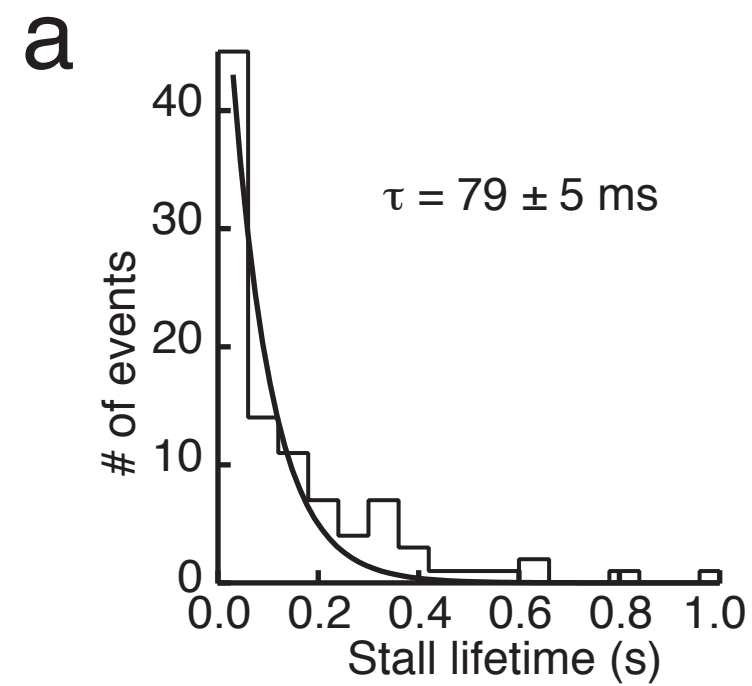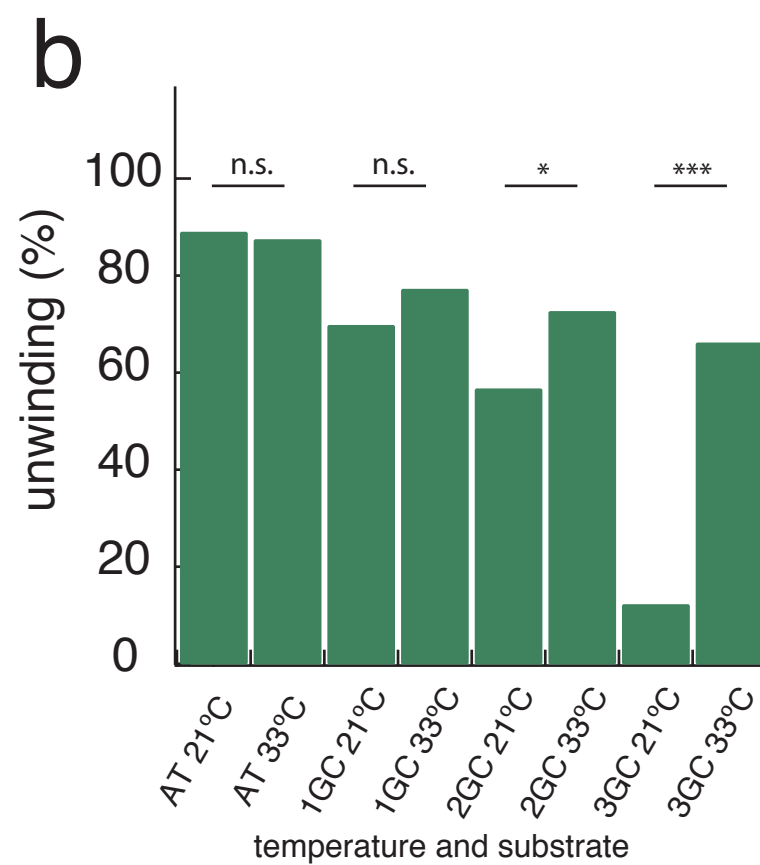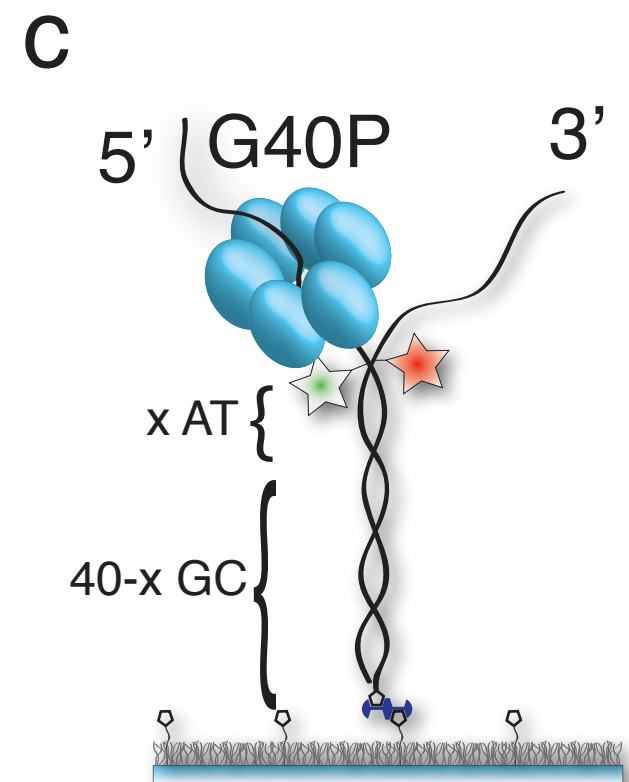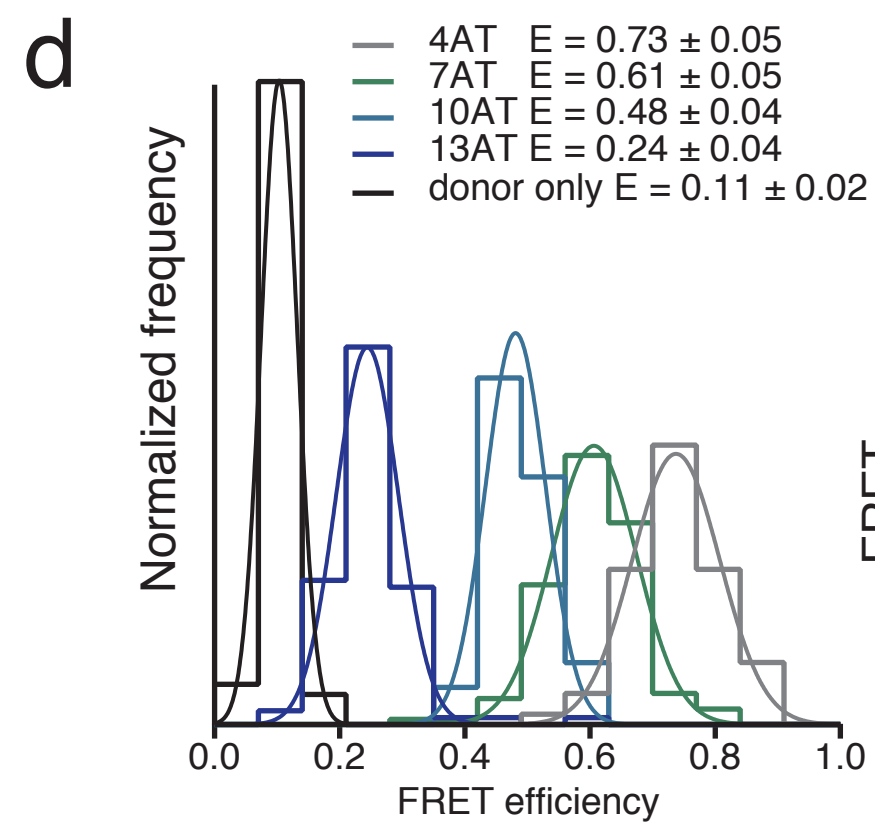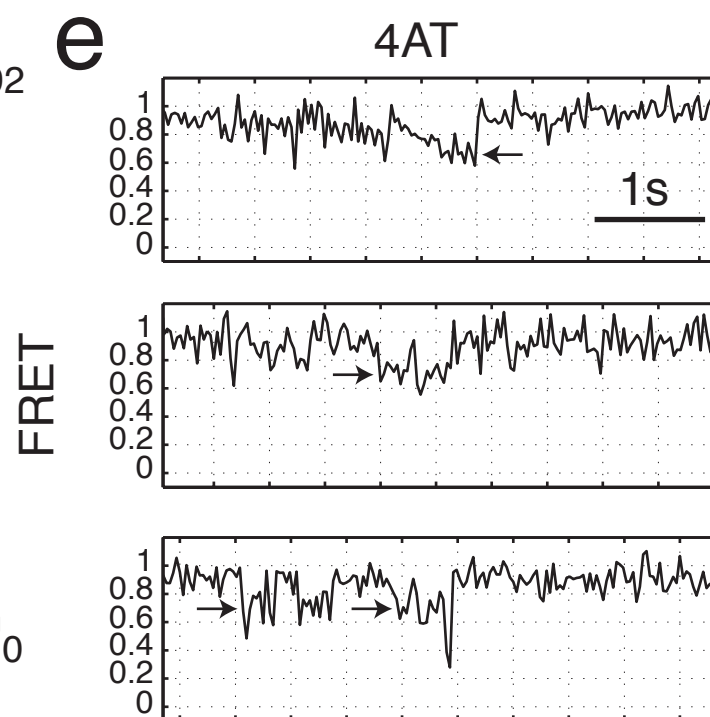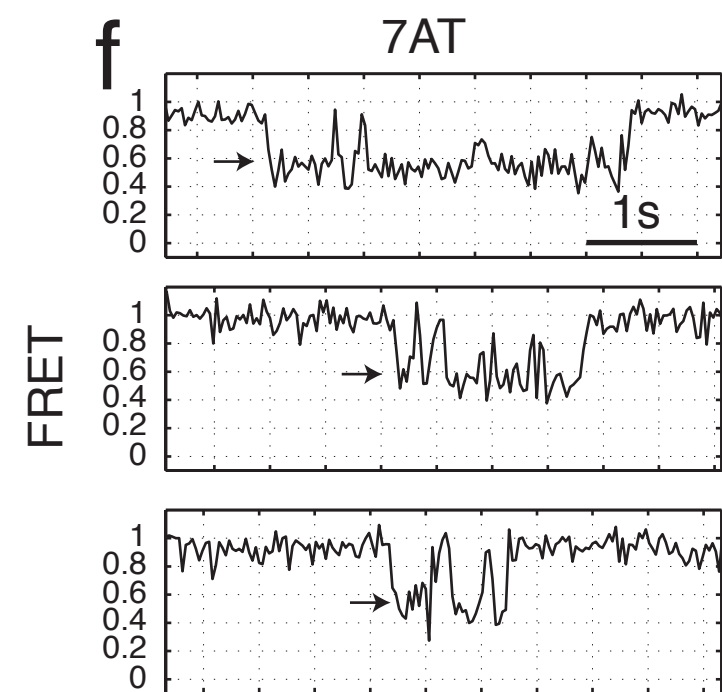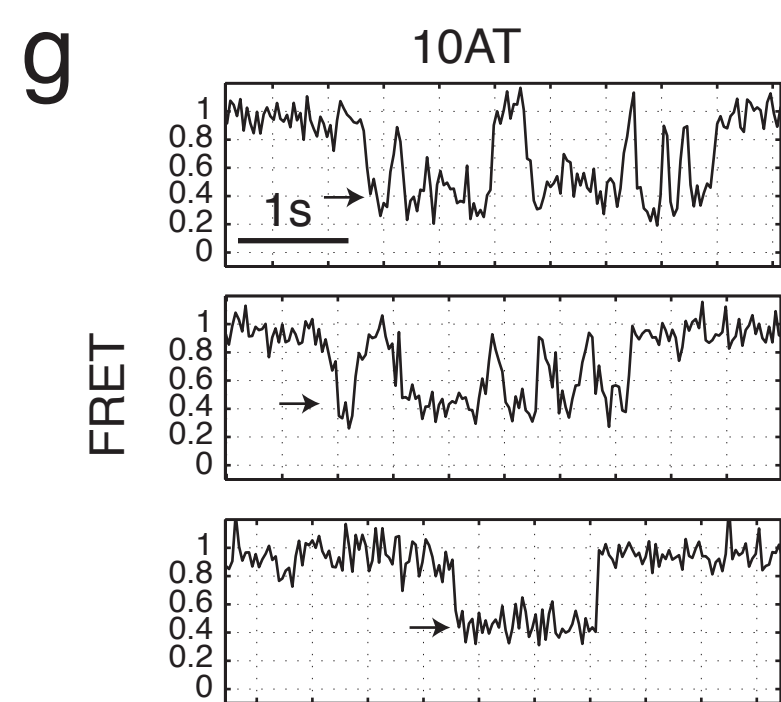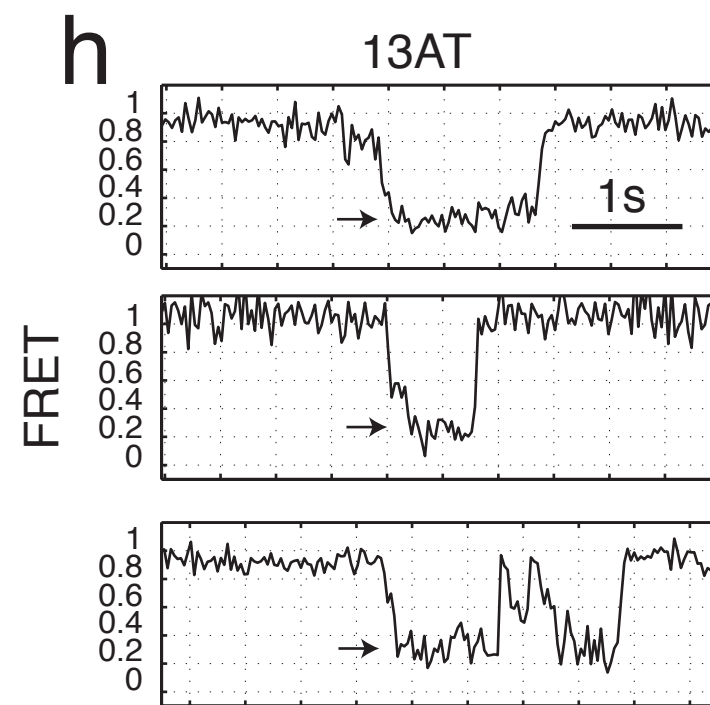

Time (s)

Supplement: supp [file elife_poa_e42001_Figure1_figure_supplement_2.pdf › elife_poa_e42001_Figure1_figure_supplement_2.pdf]

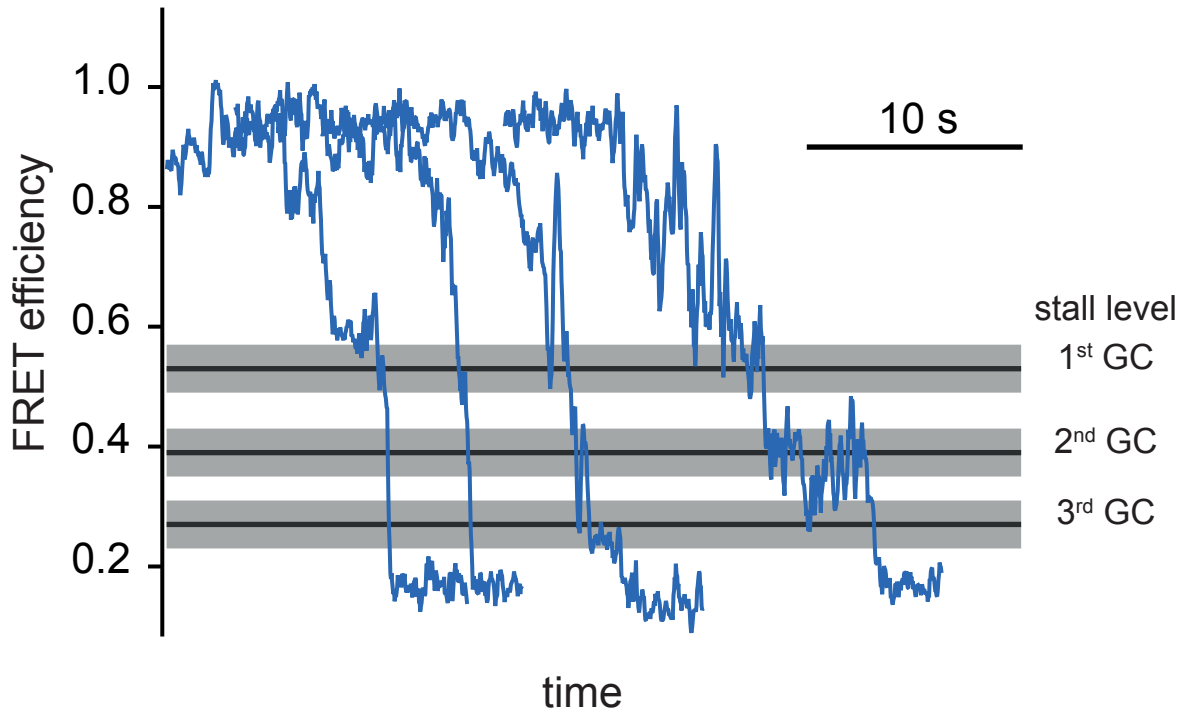

Supplement: supp [file elife_poa_e42001_Figure_1_Figure_Supplement_3.pdf › elife_poa_e42001_Figure_1_Figure_Supplement_3.pdf]

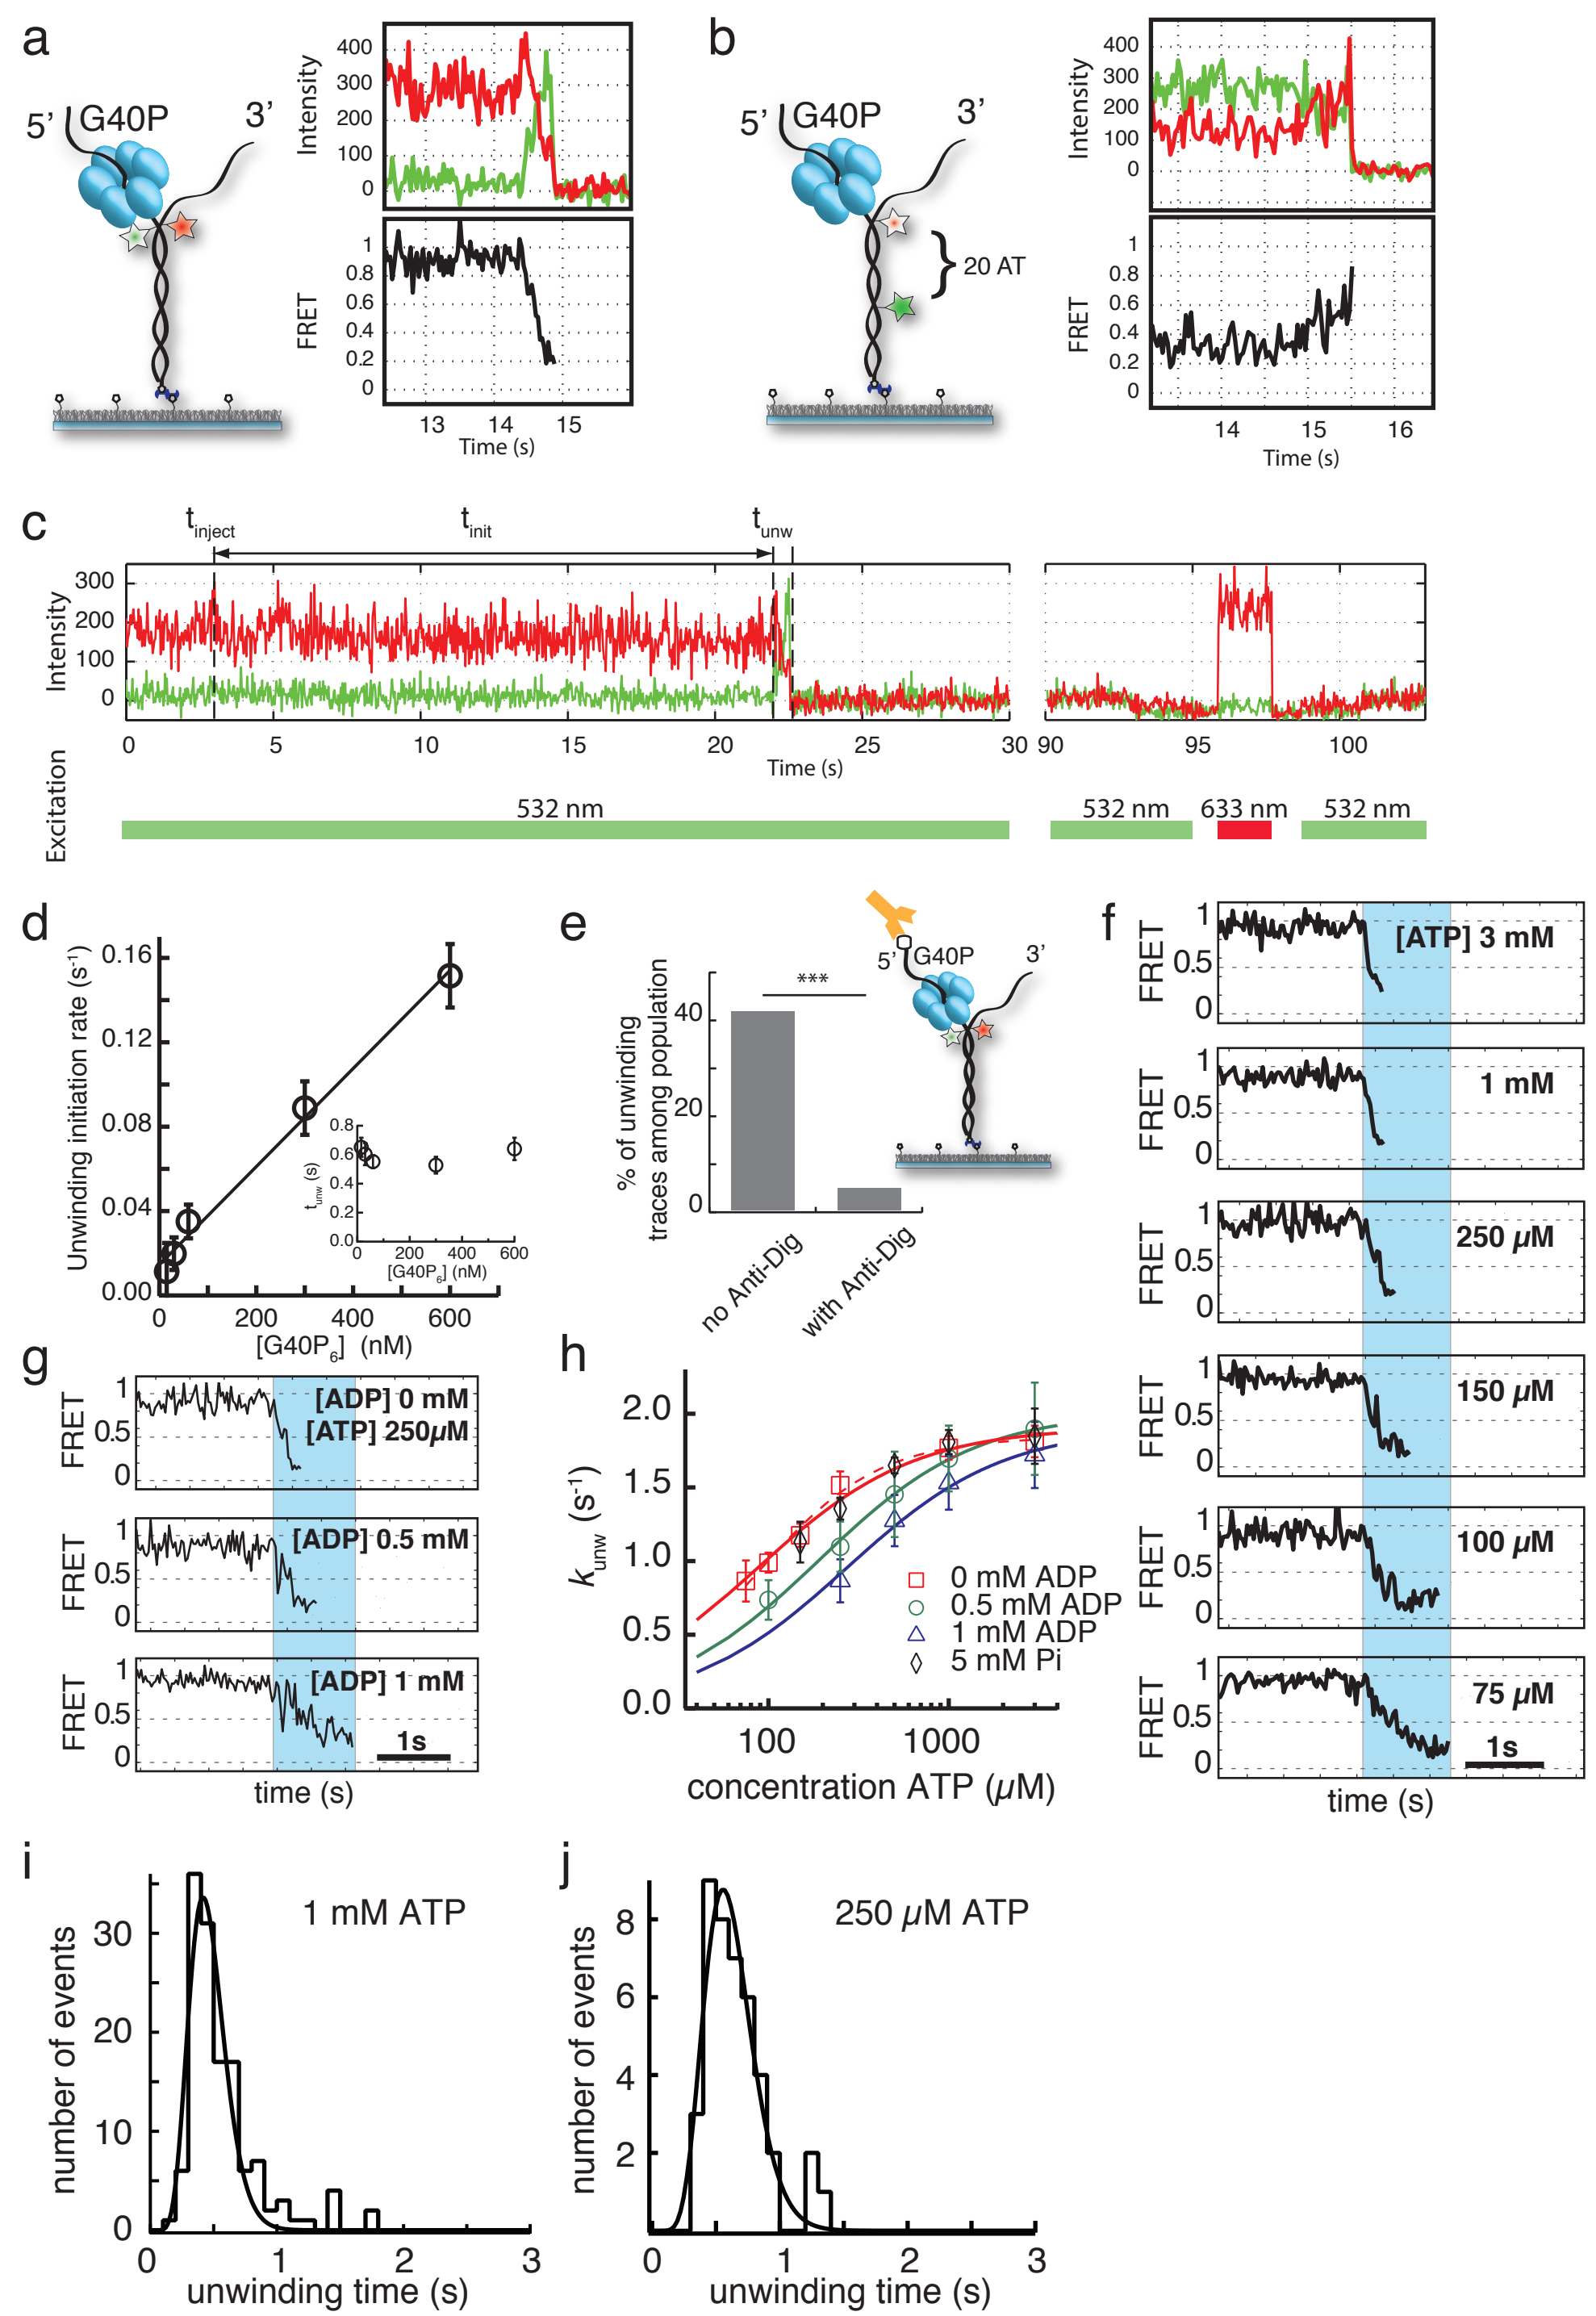

Supplement: supp [file elife_poa_e42001_Figure_1_figure_supplement_1.pdf › elife_poa_e42001_Figure_1_figure_supplement_1.pdf]

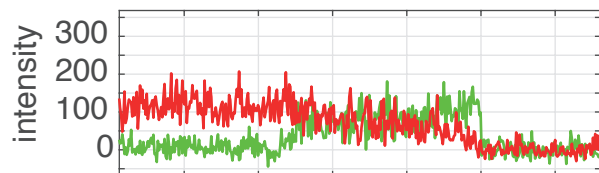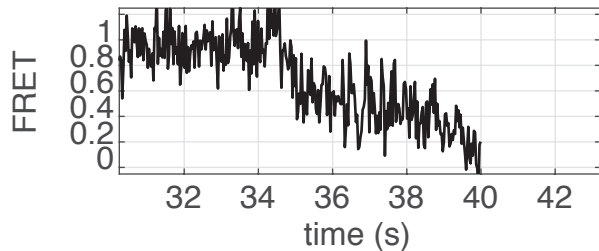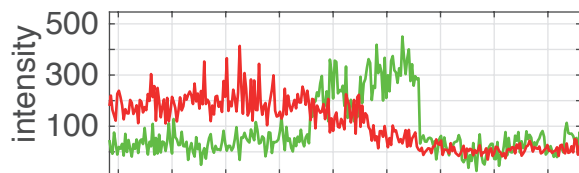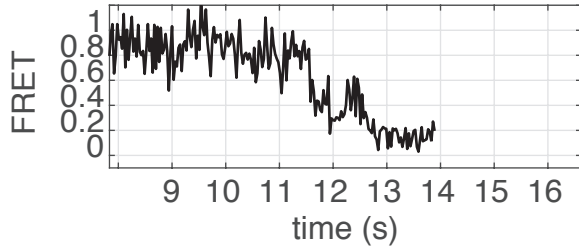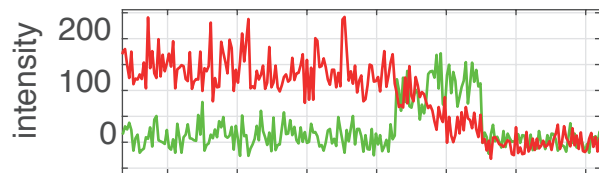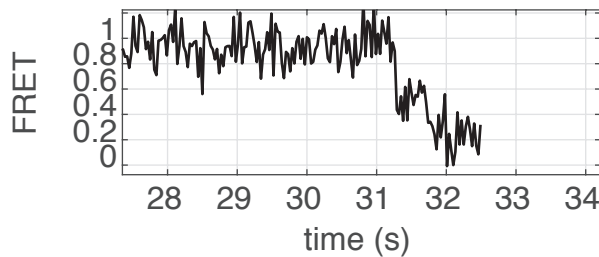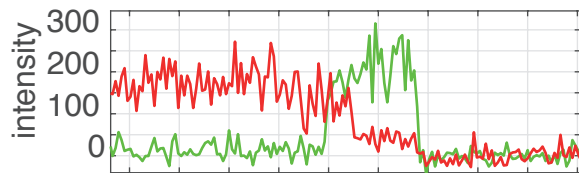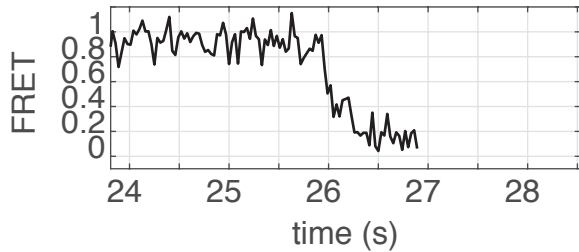

Supplement: supp [file elife_poa_e42001_Figure_3_figure_supplement_1.pdf › elife_poa_e42001_Figure_3_figure_supplement_1.pdf]

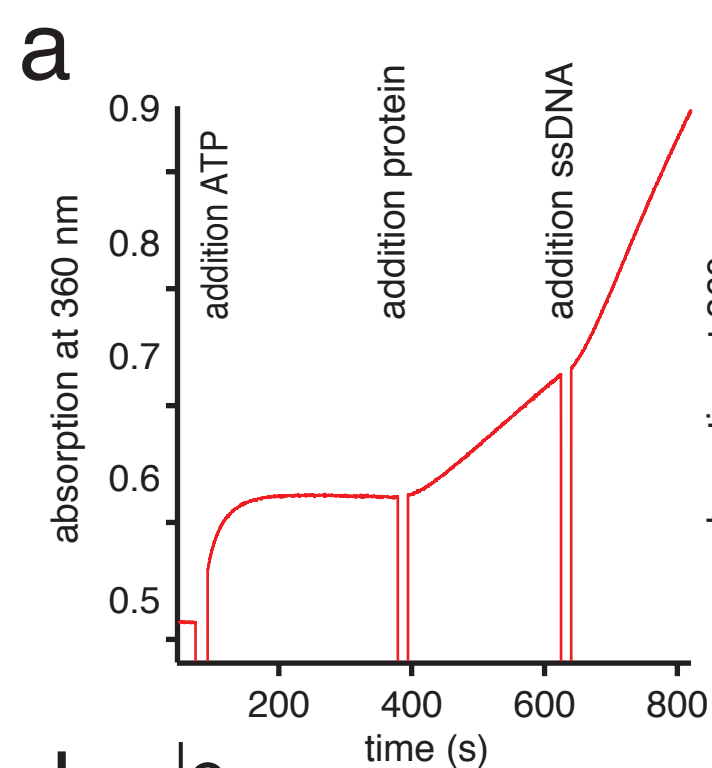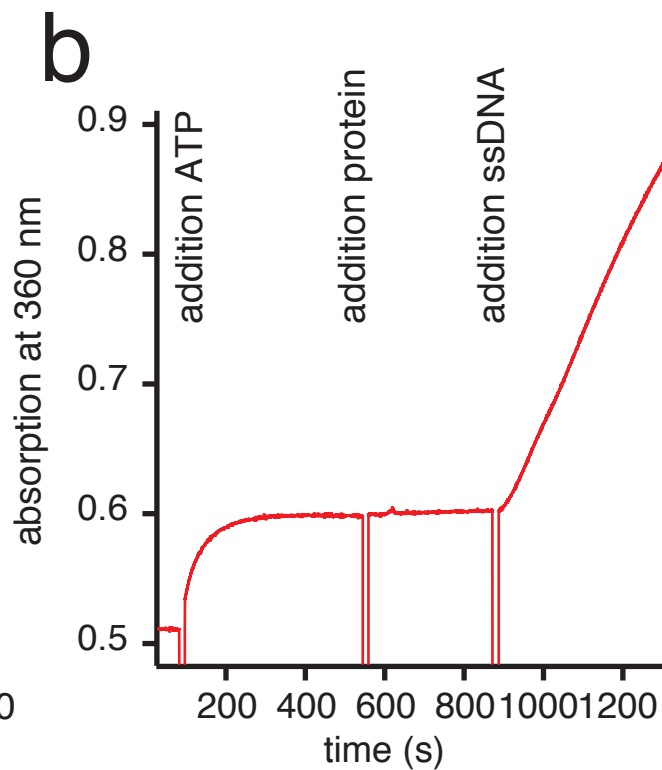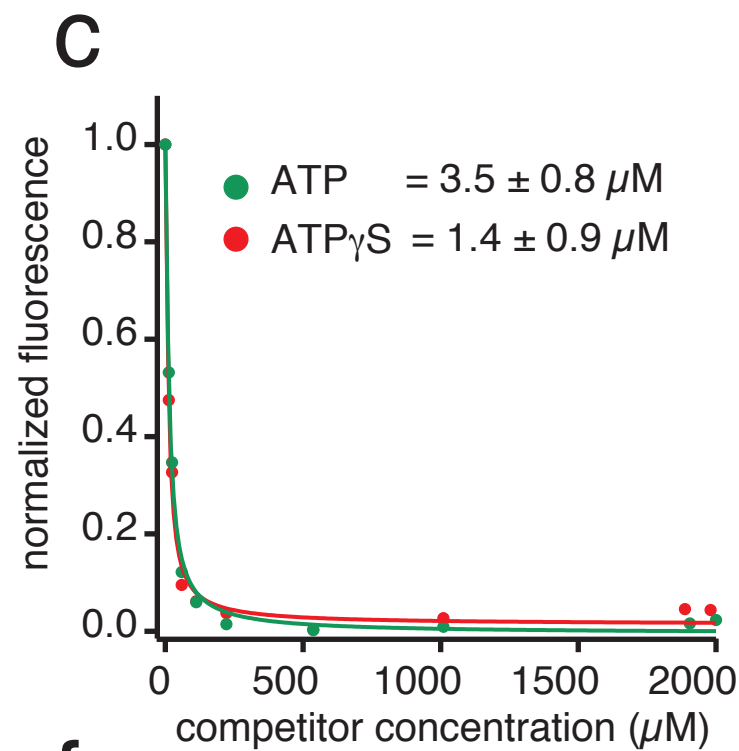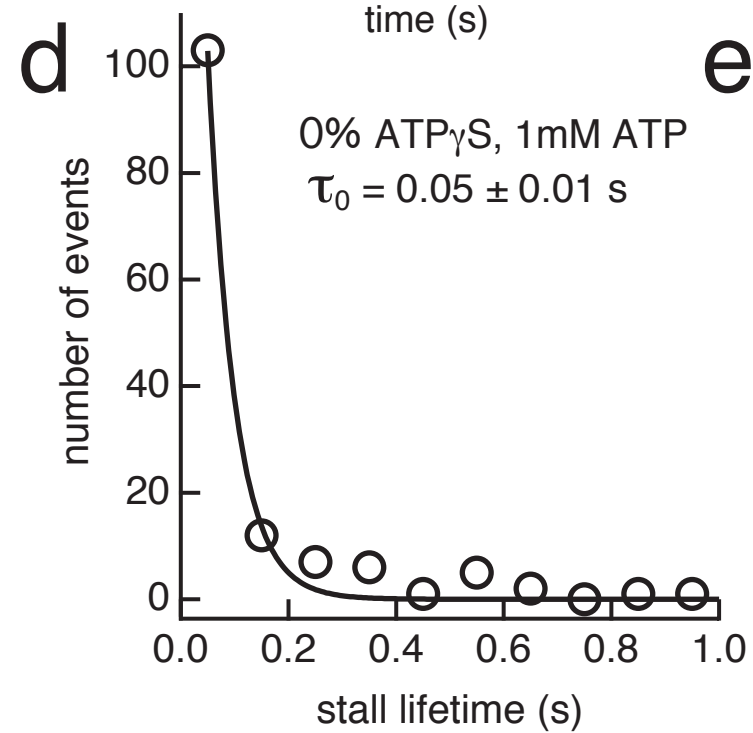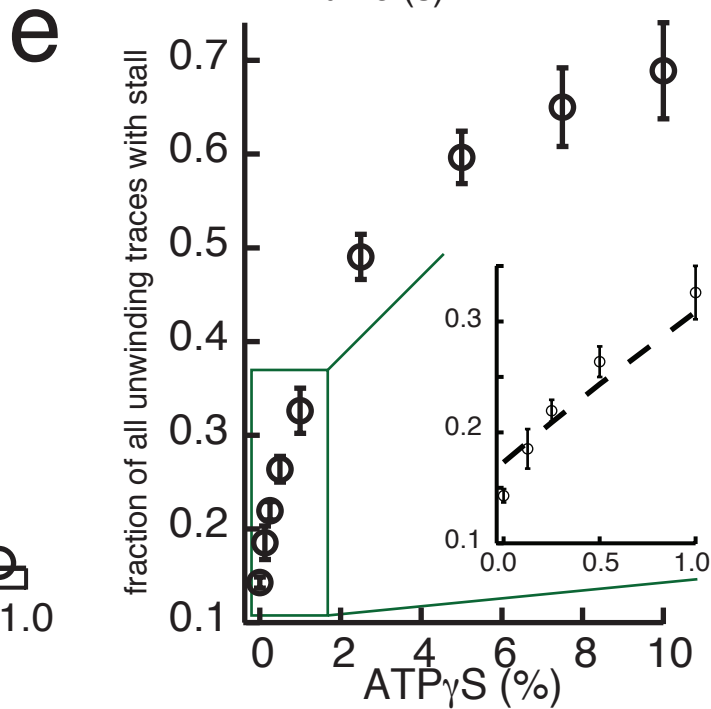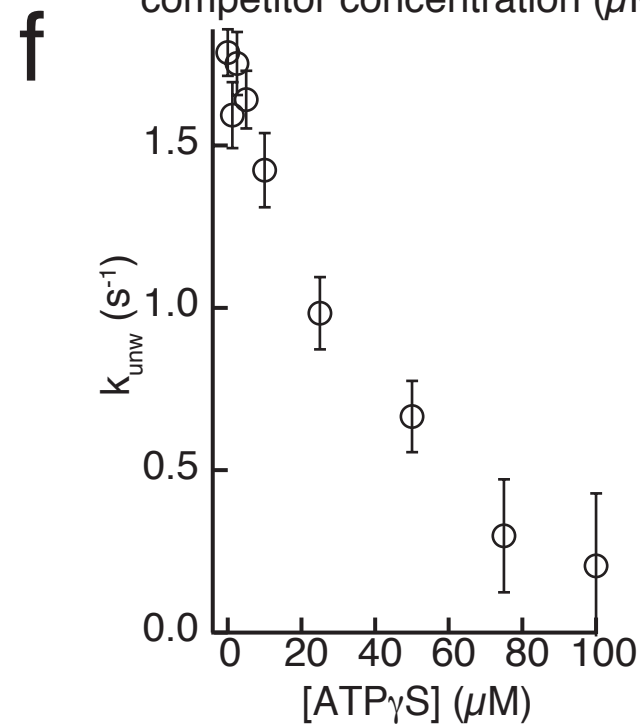

Supplement: supp [file elife_poa_e42001_Figure_4_figure_supplement_1.pdf › elife_poa_e42001_Figure_4_figure_supplement_1.pdf]
